# Supplementary material for: Phylogenetic analysis of fossil flowers using an angiosperm‐wide data set: proof‐of‐concept and challenges ahead
Source: PubMed Central journal article supplement — Am J Bot. 2020 Oct 7;107(10):1433–48. doi: 10.1002/ajb2.1538 (PMC7702048; doi:10.1002/ajb2.1538), 2020-10-07

**Appendix S4: Phylogenetic trees showing results from phyloscan analyses**

This appendix contains a compilation of the molecular backbone trees with colour-coded results of phyloscan parsimony analyses for the 10 fossils analysed in this study.

Paleo-eFLOWER phyloscanning using parsimony  
+*Chloranthistemon endressii* (12 characters)

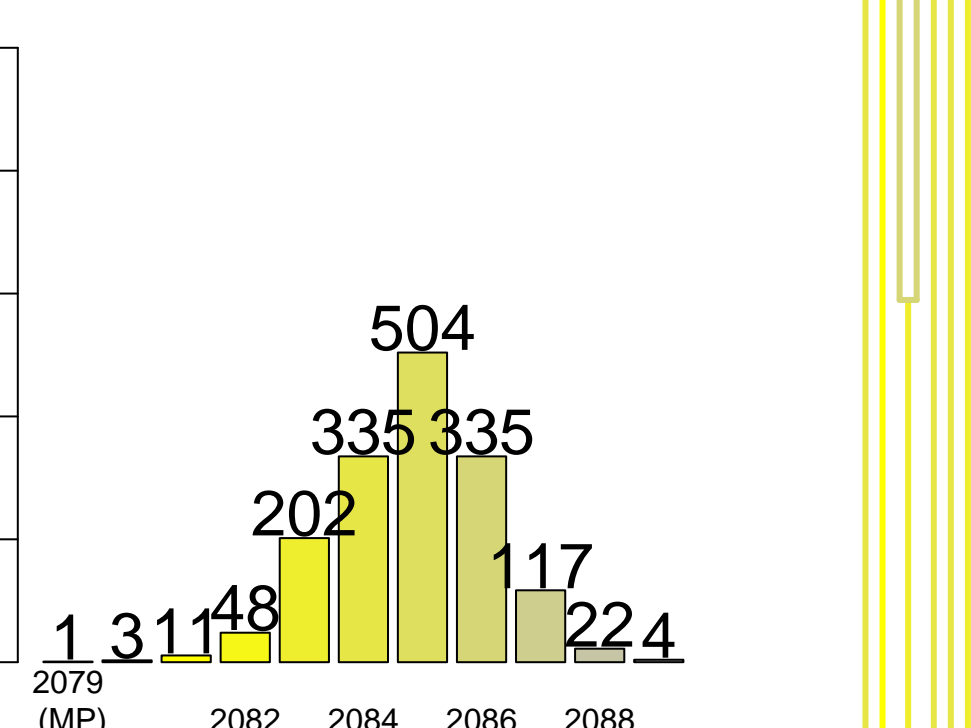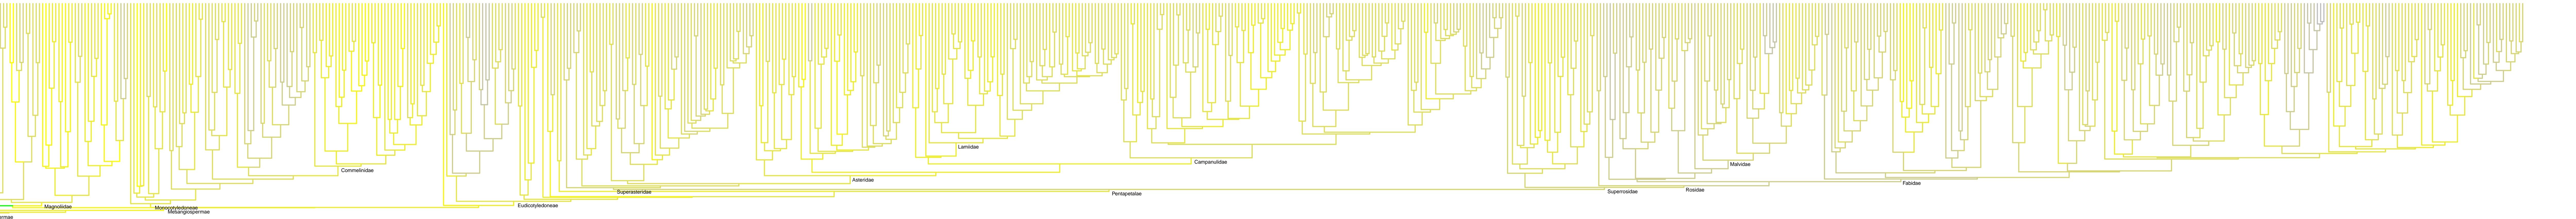

po-eFLOWER phyloscanning using parsimony

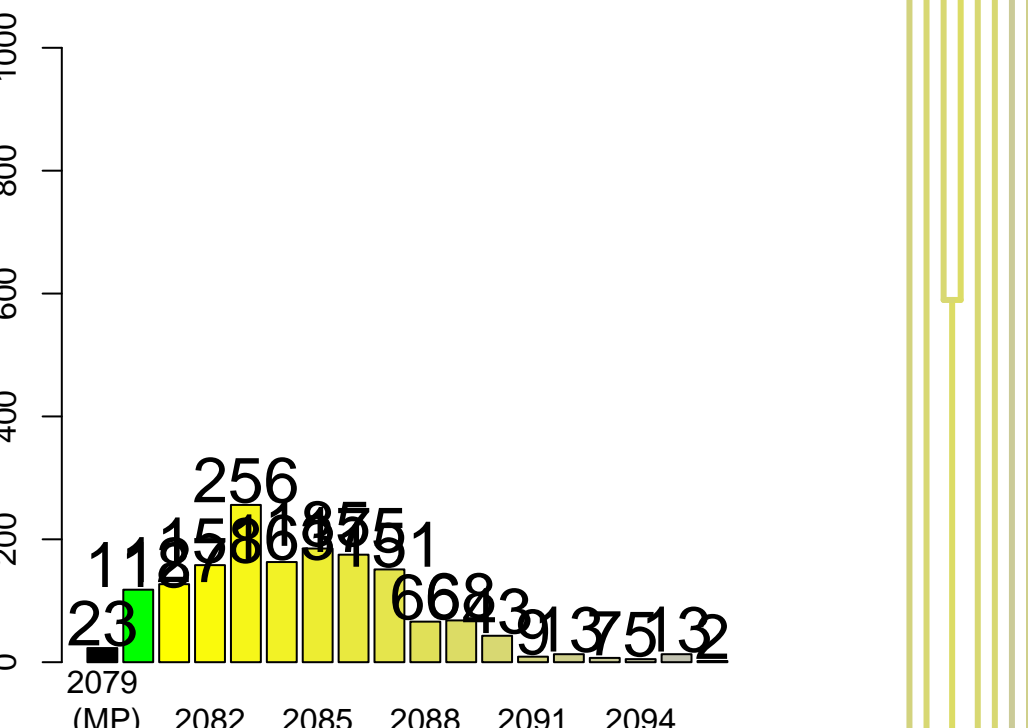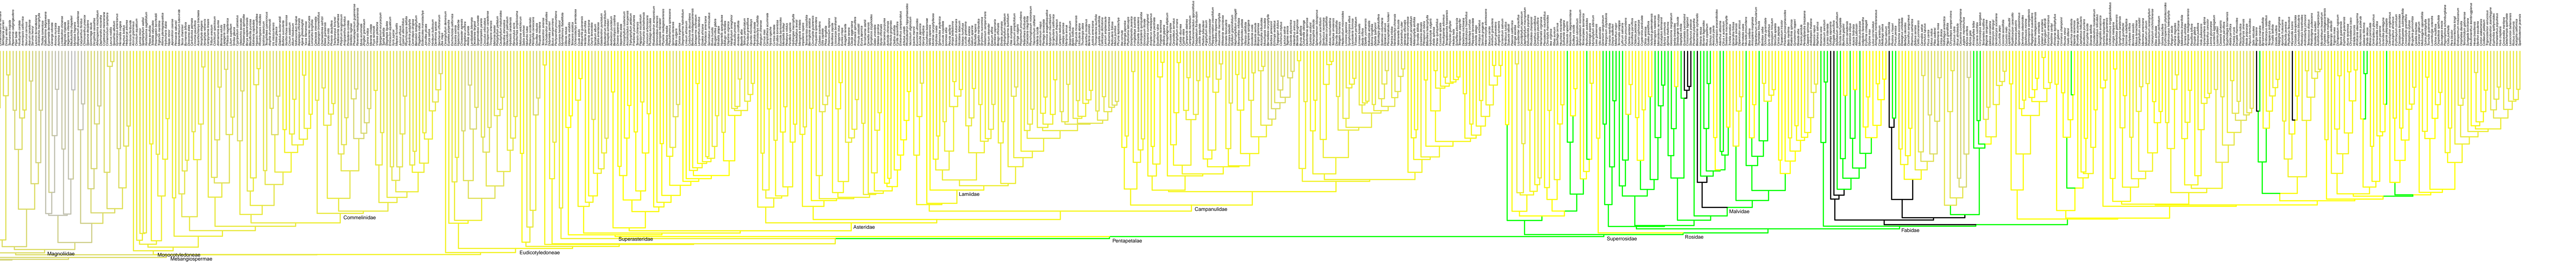

Paleo-eFLOWER phyloscanning using parsimony  
+ *Kajanthus lustranicus* (27 characters)

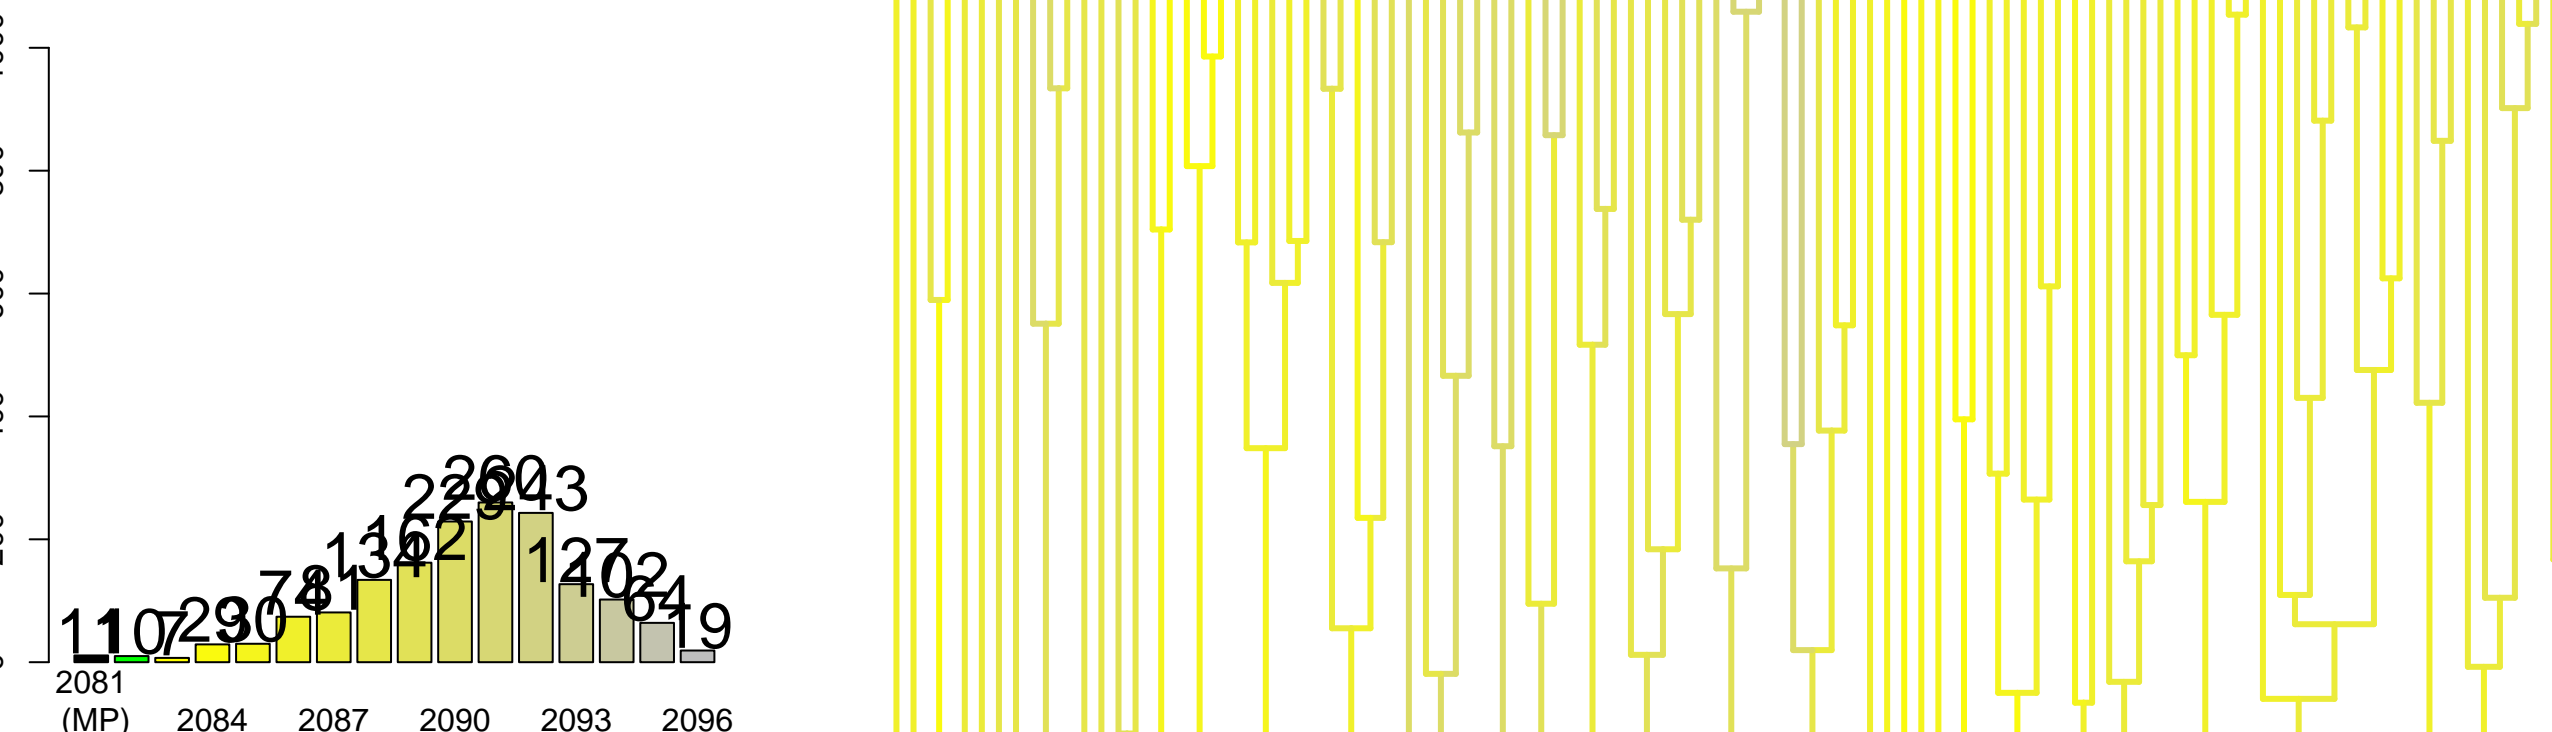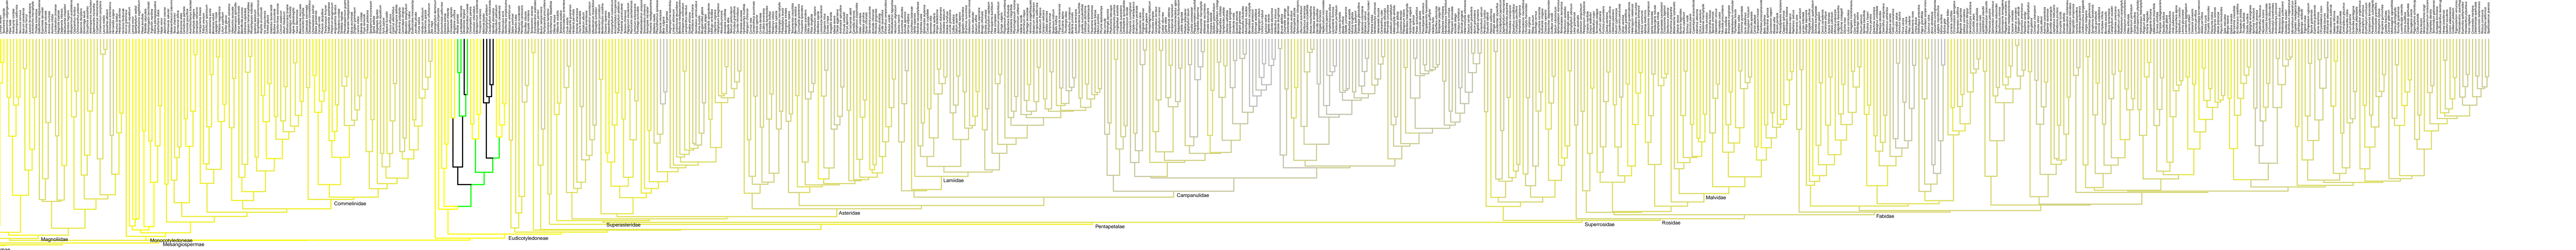

Paleo-eFLOWER phyloscanning using parsimony  
+Mauldinia mirabilis (24 characters)

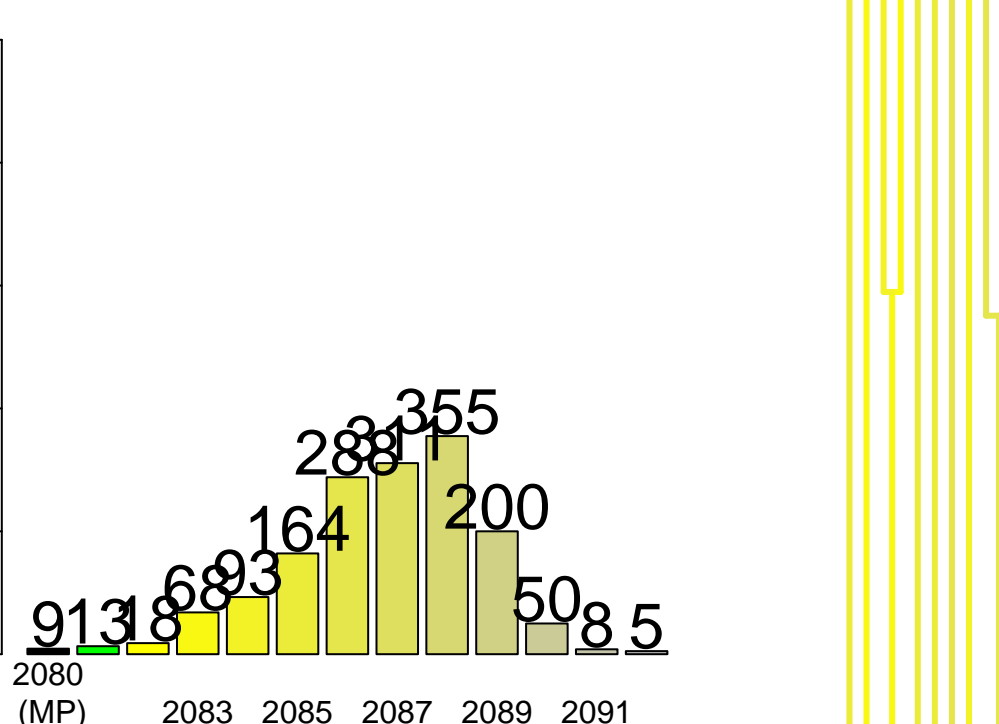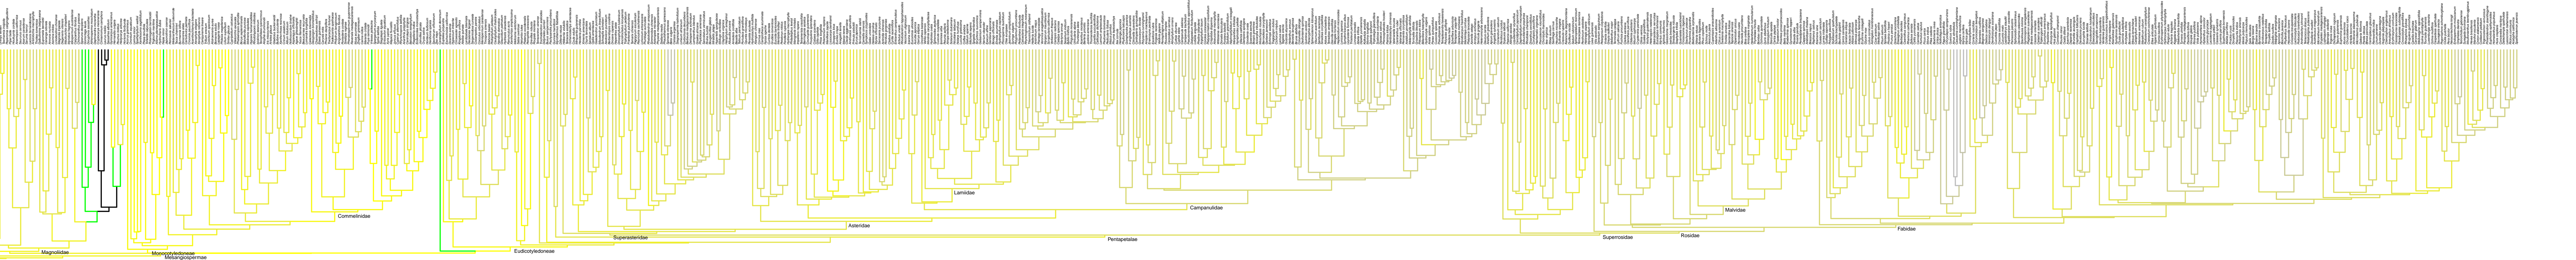

po-eFLOWER phyloclustering using parsimony

crovictoria svitkoana (20 characters)

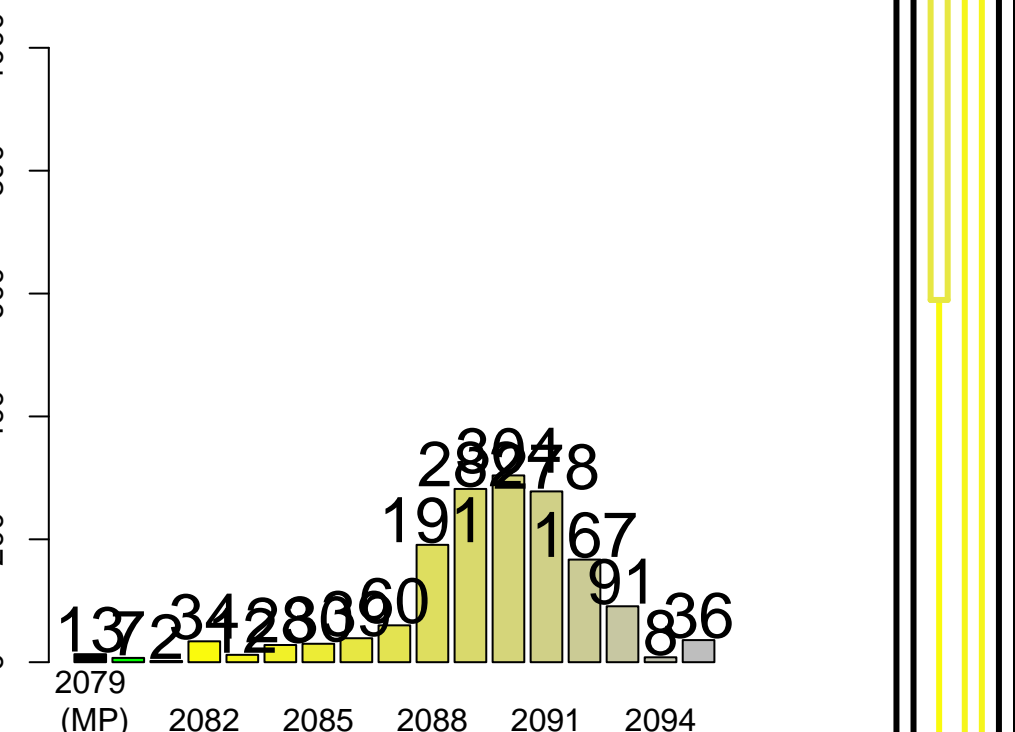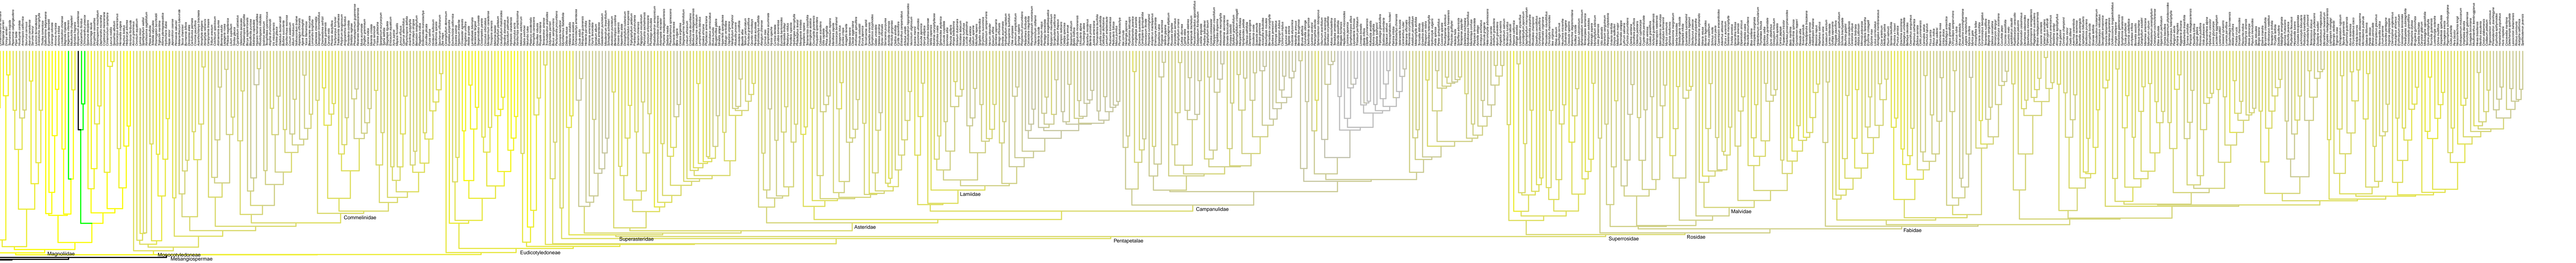

Paleo-eFLOWER phyloscanning using parsimony  
+Paleoclusia chevalieri (27 characters)

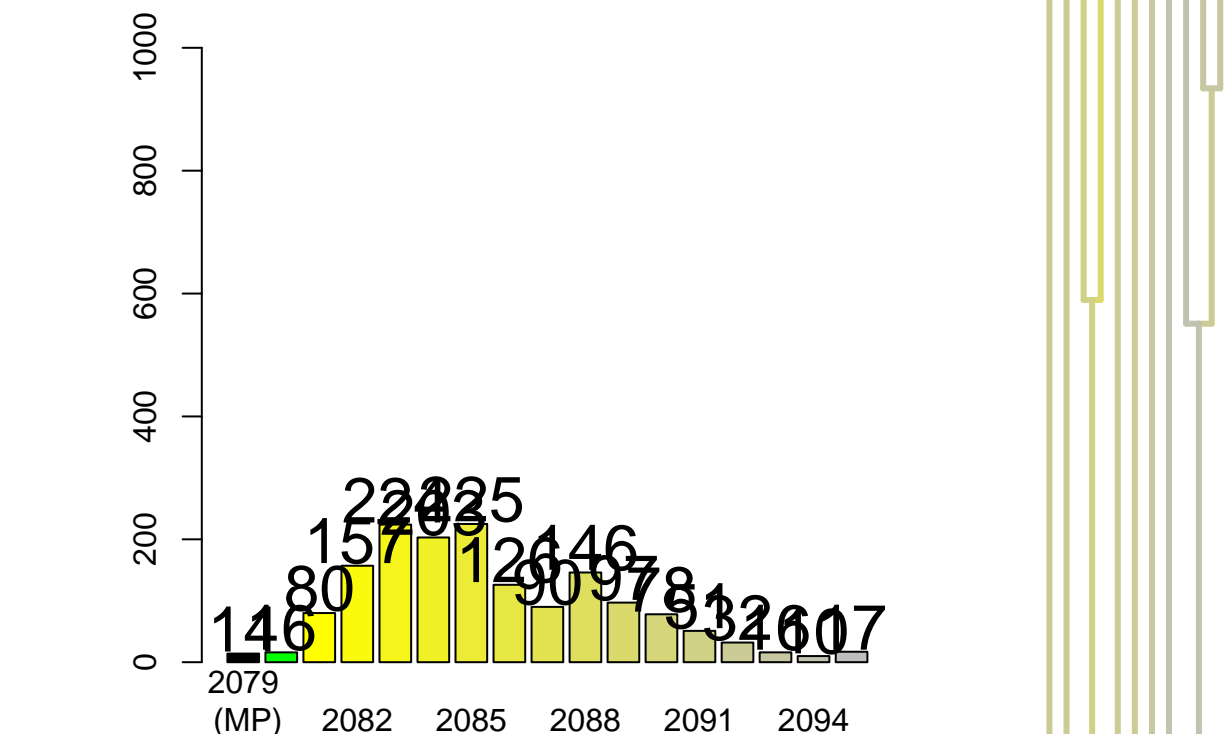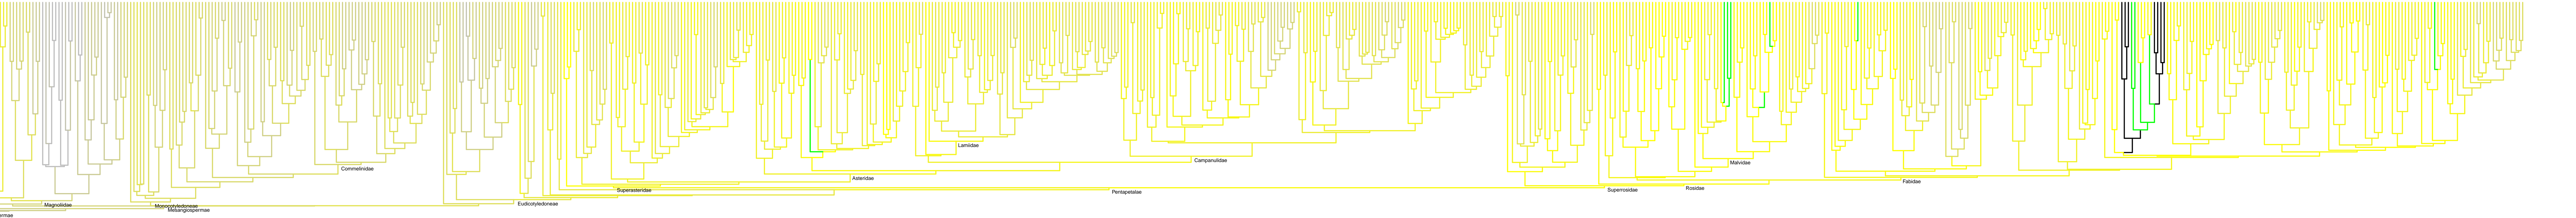

Paleo-eFLOWER phyloscanning using parsimony  
+*Paradinandra suecica* (29 characters)

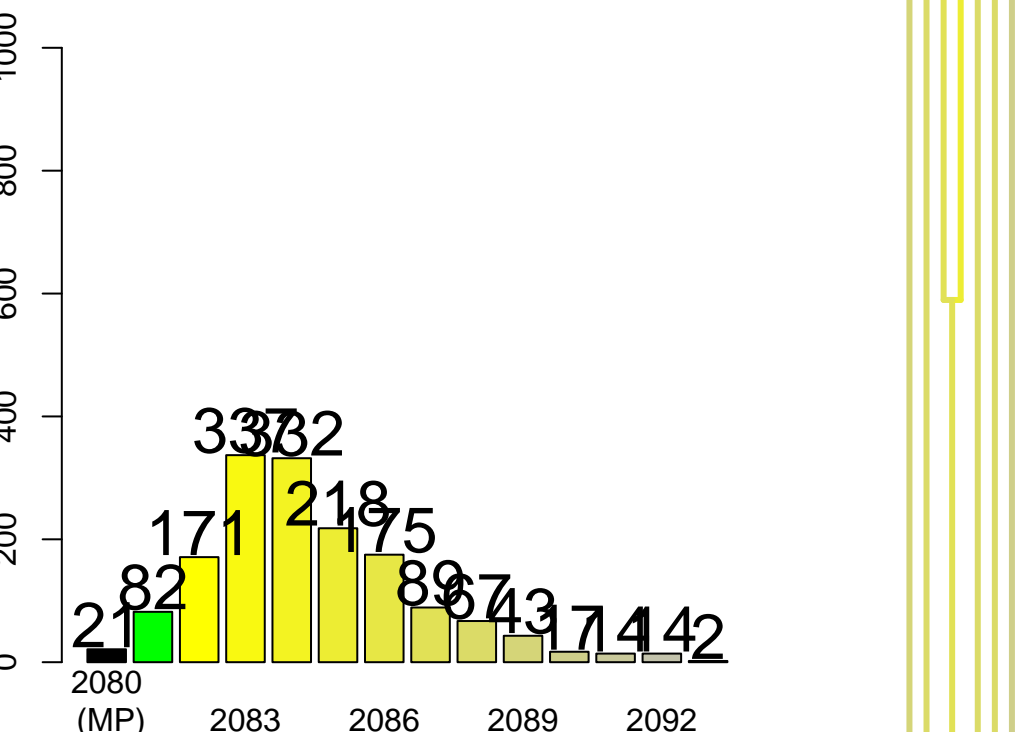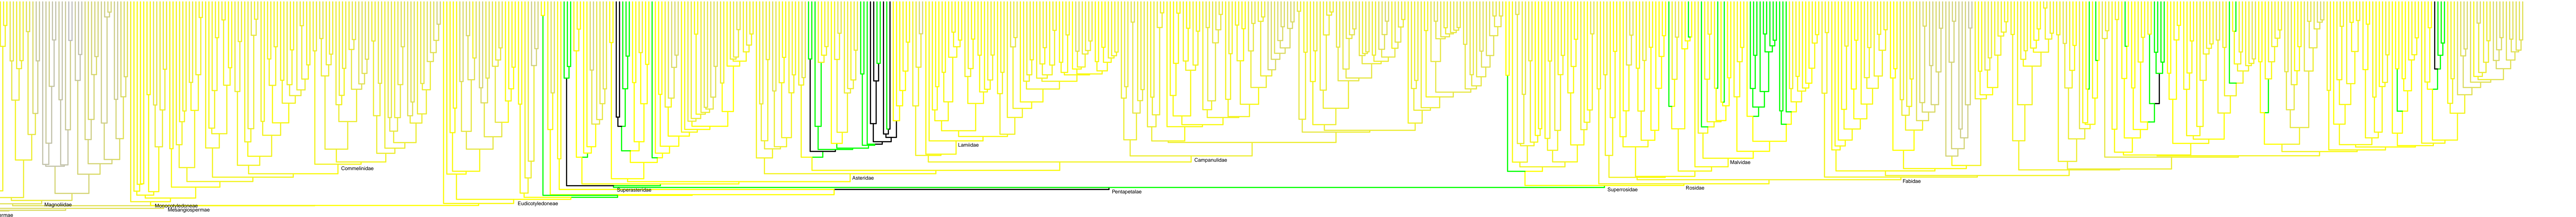

panomera mauldinensis (25 characters)

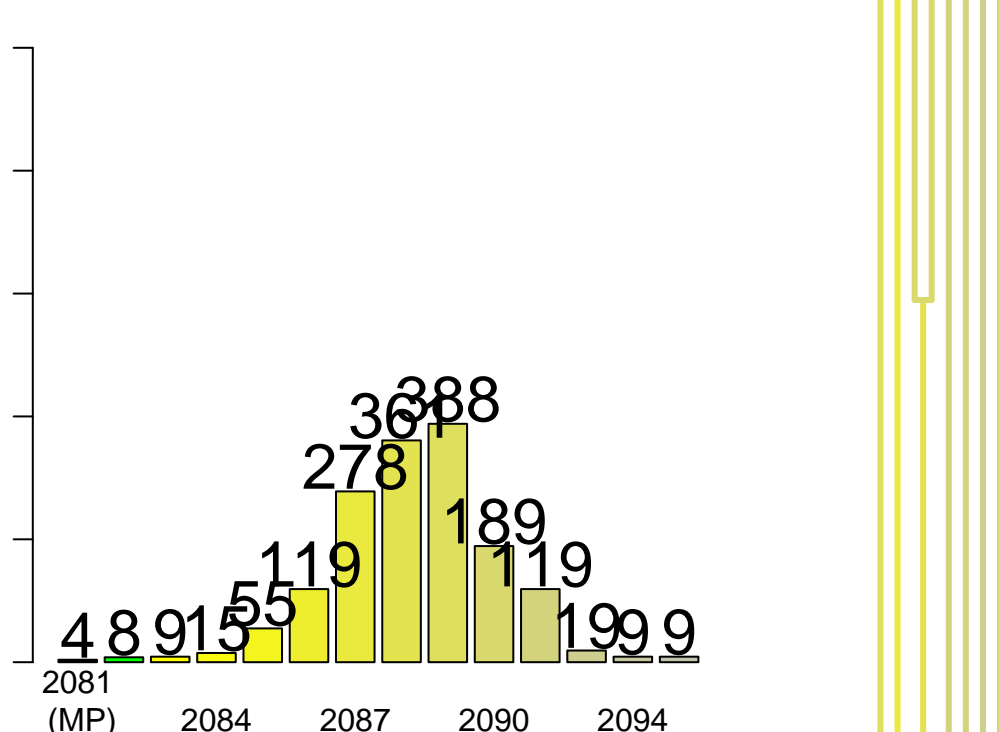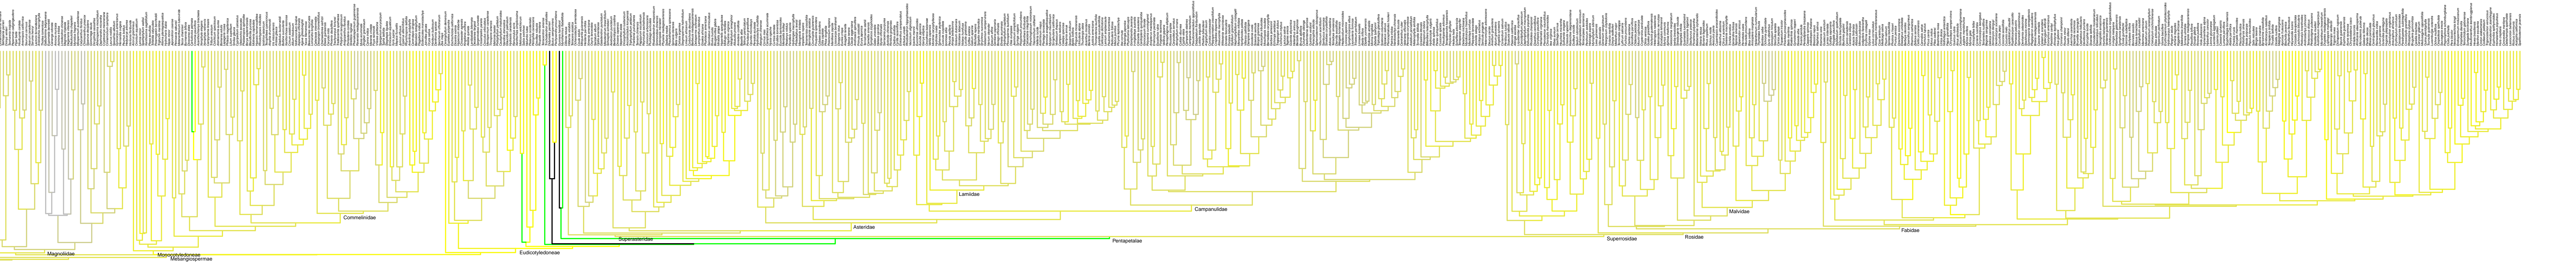

erianthus crossmanensis (29 characters)

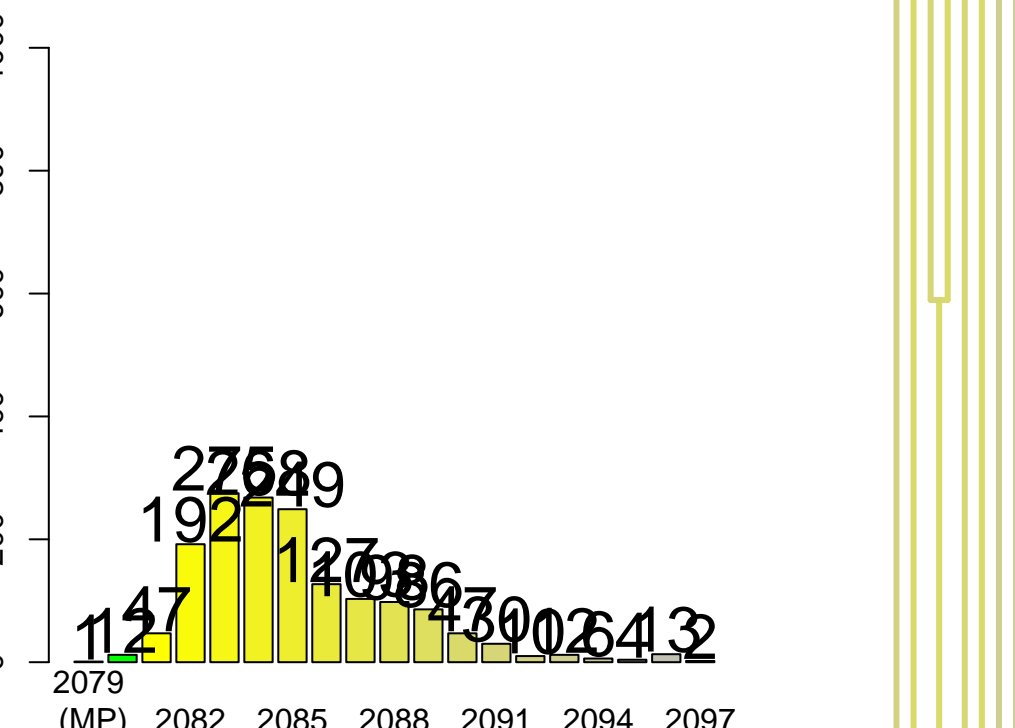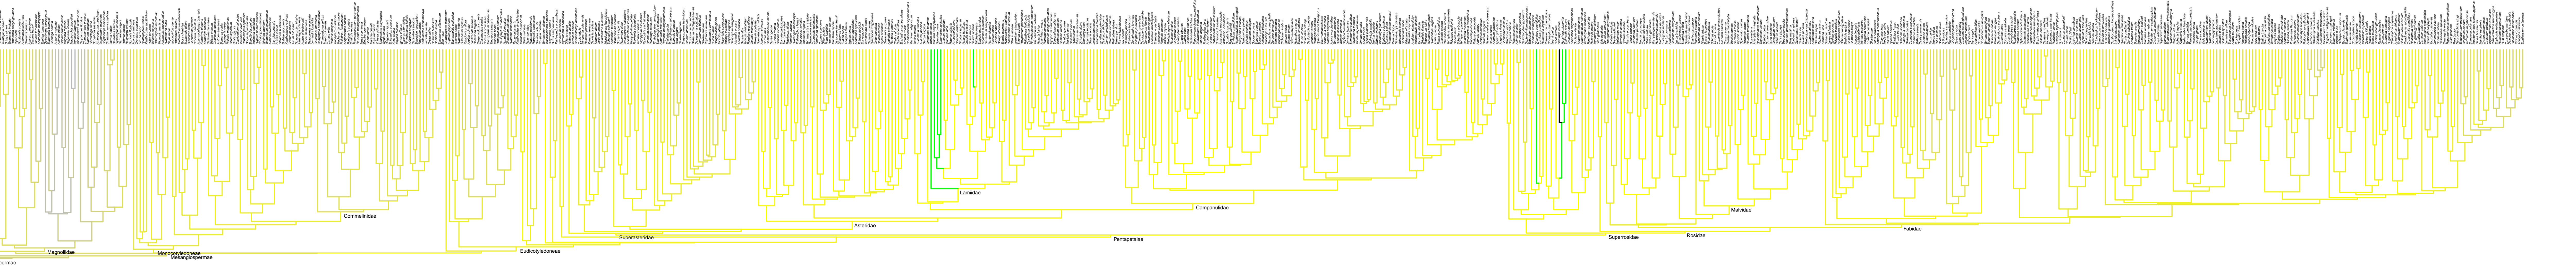

ginianthus calycanthoides (23 characters)

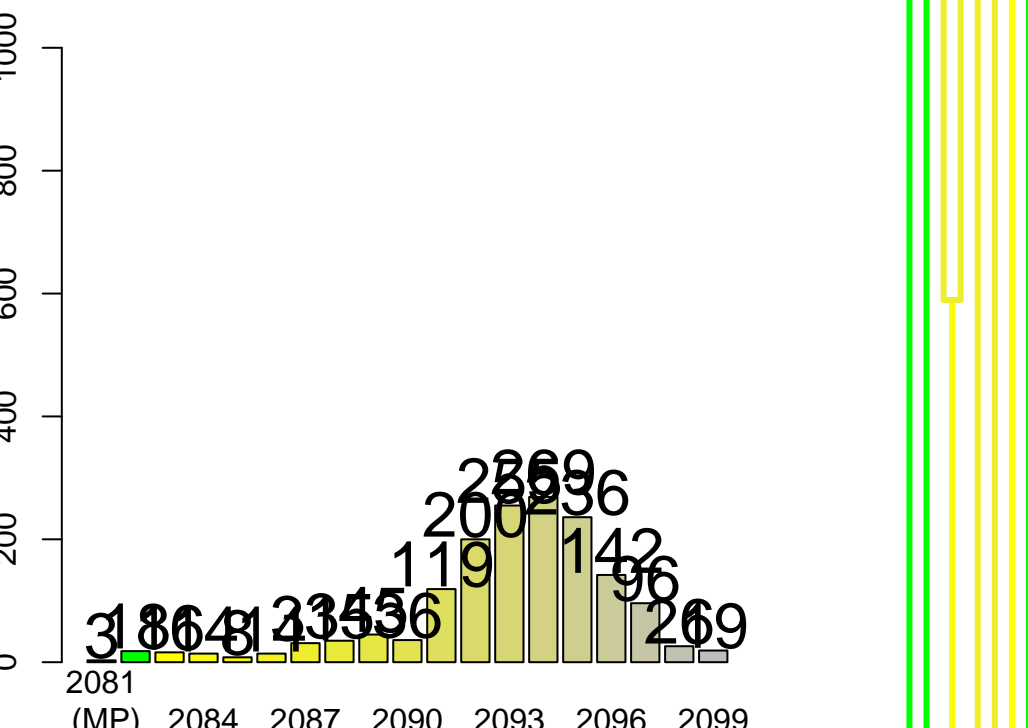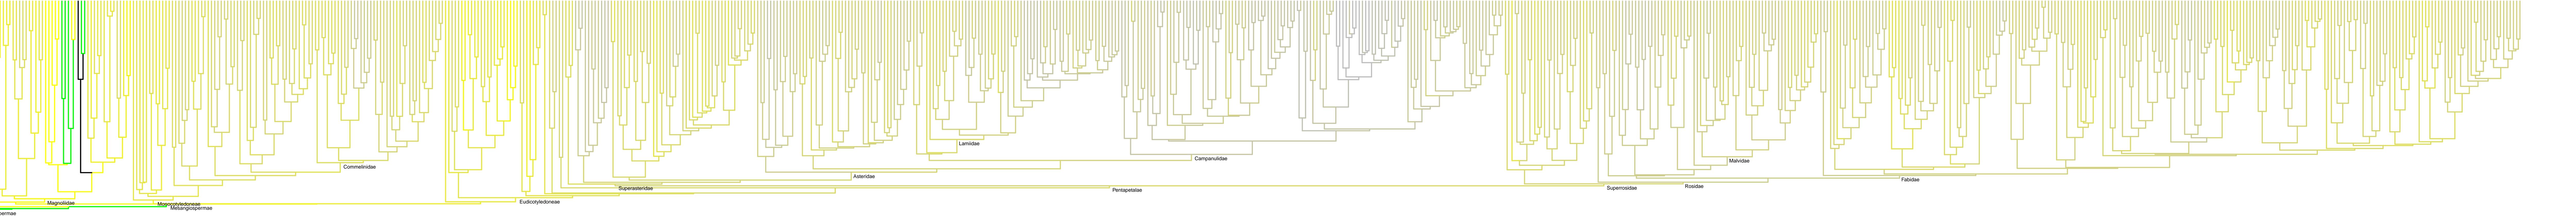

Supplement: AJB2-107-1433-s004.pdf [file AJB2-107-1433-s004.pdf]
