# Supplementary material for: Phylogenetic analysis of fossil flowers using an angiosperm‐wide data set: proof‐of‐concept and challenges ahead
Source: PubMed Central journal article supplement — Am J Bot. 2020 Oct 7;107(10):1433–48. doi: 10.1002/ajb2.1538 (PMC7702048; doi:10.1002/ajb2.1538), 2020-10-07
Supplement: AJB2-107-1433-s005.pdf [file AJB2-107-1433-s005.pdf]

**Appendix S5: Overview and comparison of results of phyloscan analyses using five distinct phylogenetic backbones (A-E tree series from Sauquet et al., 2017).**

| Species                           | No. of analysed characters (of 30) | No. of most parsimonious (MP/MP+1) positions |        |                           |        |       | Systematic (MP) placement according to this study                                                                                                             |
|-----------------------------------|------------------------------------|----------------------------------------------|--------|---------------------------|--------|-------|---------------------------------------------------------------------------------------------------------------------------------------------------------------|
|                                   |                                    | A                                            | B      | C                         | D      | E     |                                                                                                                                                               |
| <i>Chloranthistemon endressii</i> | 12                                 | 1/3                                          | 1/3    | 1/3                       | 1/2    | 1/3   | CG Chloranthaceae (Chloranthales)                                                                                                                             |
| <i>Dakotanthus cordiformis</i>    | 29                                 | 23/118                                       | 12/107 | 10/124 (incl. SG Rosidae) | 18/108 | 9/108 | CG Rosidae (including many MP positions in Fabidae and Malvidae)                                                                                              |
| <i>Kajanthus lusitanicus</i>      | 27                                 | 11/10                                        | 15/8   | 15/8                      | 15/8   | 15/8  | CG Ranunculales (Eudicotyledoneae), with several MP positions in Lardizabalaceae and Berberidaceae                                                            |
| <i>Mauldinia mirabilis</i>        | 24                                 | 9/13                                         | 9/4    | 9/13                      | 9/4    | 9/4   | CG Laurales (Magnoliidae), with 9 MP positions in the clade with Lauraceae, Hernandiaceae, and Monimiaceae                                                    |
| <i>Microvictoria svitkoana</i>    | 20                                 | 13/7                                         | 13/7   | 13/7                      | 13/7   | 13/7  | 12 MP positions in CGs and SGs of the ANA-grade (Amborellales, Nymphaeales, and Austrobaileyales); 1 MP position in CG Calycanthaceae (Laurales, Magnoliidae) |

|                                     |    |       |       |       |       |       |                                                                                                                                                                        |
|-------------------------------------|----|-------|-------|-------|-------|-------|------------------------------------------------------------------------------------------------------------------------------------------------------------------------|
| <i>Paleoclusia chevalieri</i>       | 27 | 14/16 | 10/32 | 17/22 | 17/25 | 17/25 | CG and SG of the clusioid clade (Malpighiales, Fabidae); 14 MP positions, most in CG Clusiaceae and CG Hypericaceae                                                    |
| <i>Paradinandra suecica</i>         | 29 | 21/82 | 1/26  | 23/82 | 1/28  | 1/28  | Numerous MP positions in CG Ericales (Asteridae); additional MP positions in different clades of CG Pentapetalae (e.g., Caryophyllales, Malpighiales, and Dilleniales) |
| <i>Spanomera mauldinensis</i>       | 25 | 4/8   | 3/2   | 4/8   | 3/5   | 3/3   | 3 MP positions in CG and SG Buxales and 1 MP position in CG Gunnerales (Eudicotyledoneae)                                                                              |
| <i>Tylerianthus crossmanensis</i>   | 29 | 1/12  | 1/12  | 1/12  | 1/12  | 1/12  | 1 MP position in CG Saxifragaceae (Saxifragales, Superrosidae)                                                                                                         |
| <i>Virginianthus calycanthoides</i> | 23 | 3/18  | 3/15  | 3/20  | 3/15  | 3/16  | 3 MP positions in CG and SG Calycanthaceae (Laurales, Magnoliidae)                                                                                                     |
